# Supplementary material for: Microwave heating followed by a solvothermal method to synthesize nickel–cobalt selenide/rGO for high-performance supercapacitors
Source: Royal Society of Chemistry journal article supplement (doi:10.1039/d2nj00488g), 2022-01-01
Supplement: d2nj00488g1.pdf [file d2nj00488g1.pdf]

## **Microwave heating followed by solvothermal method to synthesize nickel-cobalt selenide/rGO for high-performance supercapacitors**

Tianli Zhou<sup>1,2</sup>, Shuihua Tang<sup>1,2,\*</sup>, Honglin Yu<sup>1,2</sup>, Lieha Shen<sup>1,2</sup>, Qiankuan Huang<sup>1,2</sup>, Shuang Yang<sup>1,2</sup>, Limei Yu<sup>1,2</sup>, Lei Zhang<sup>1,3,\*</sup>

<sup>1</sup> State Key Lab of Oil and Gas Reservoir Geology & Exploitation, Southwest Petroleum University, Chengdu 610500, P R China.

<sup>2</sup> School of New Energy and Materials, Southwest Petroleum University, Chengdu 610500, P R China

<sup>3</sup> School of Chemical Engineering, Southwest Petroleum University, Chengdu 610500, P R China

\* Corresponding author. Shuihua Tang, Tel: +86-2883032879, E-mail: [spraytang@hotmail.com](mailto:spraytang@hotmail.com)

Lei Zhang, Tel: +86-2883037334, E-mail: [zgc166929@aliyun.com](mailto:zgc166929@aliyun.com)

## The preparation of activate carbon (AC) electrode

The AC was used as active material mixing with carbon nanotubes (conductive agent) and Nafion solution (binder) at a ratio of 80:15:5, then a suspension was obtained. The suspension was coated on nickel foam to form an electrode material with an active materials mass loading of  $1 \text{ mg cm}^{-2}$ . Electrochemical performances of the electrode material were evaluated in a standard three-electrode system (platinum electrode as the counter electrode, and Hg/HgO electrode as the reference electrode) with 6 M KOH as the electrolyte.

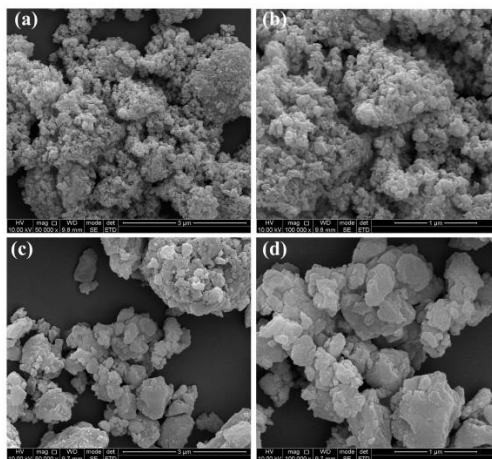

**Figure S1.** SEM images of  $(\text{Ni}_{0.85}\text{Se})_3(\text{Co}_{0.85}\text{Se})/\text{rGO}$  composites prepared by (a, b) microwave heating method; (c, d) solvothermal method.

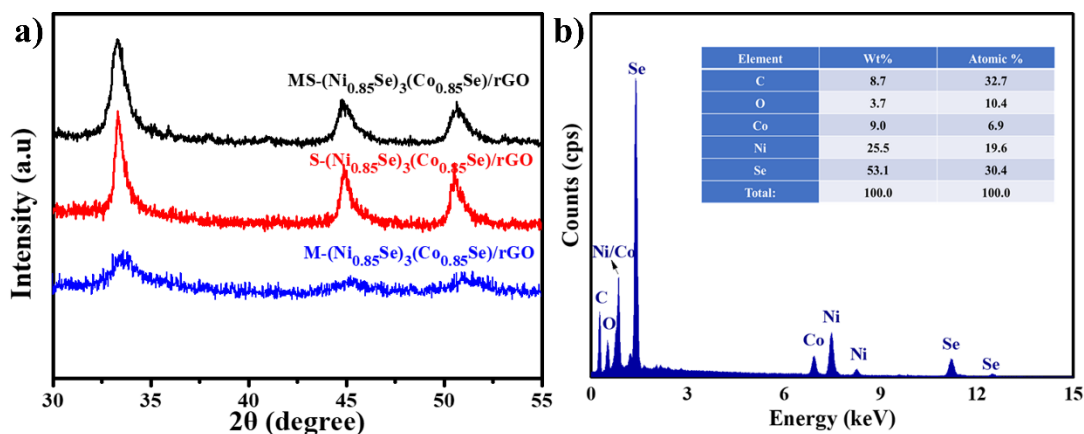

**Figure S2.** (a) XRD patterns of  $(\text{Ni}_{0.85}\text{Se})_3(\text{Co}_{0.85}\text{Se})/\text{rGO}$  synthesized *via* different methods; (b) EDS spectrum of  $\text{MS}-(\text{Ni}_{0.85}\text{Se})_3(\text{Co}_{0.85}\text{Se})/\text{rGO}$ .

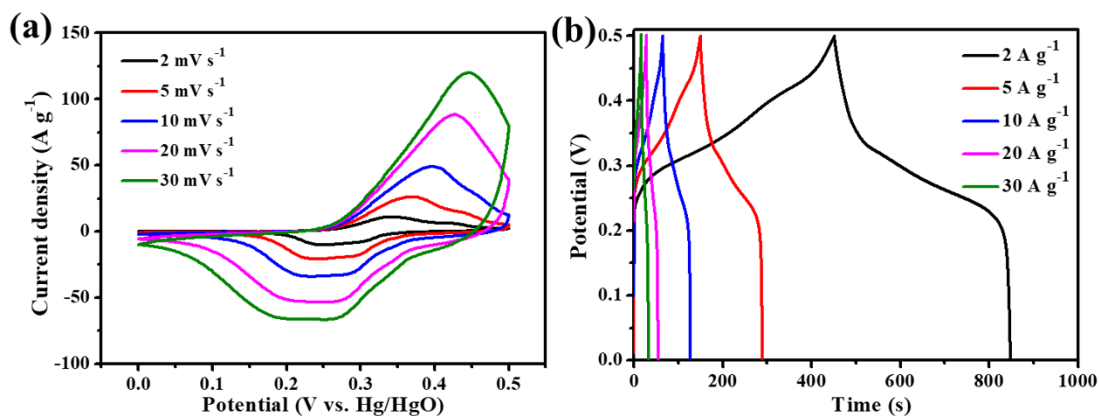

**Figure S3.** Electrochemical performances of M-(Ni<sub>0.85</sub>Se)<sub>3</sub>(Co<sub>0.85</sub>Se)/rGO electrode: (a) CV curves; (b) GCD curves.

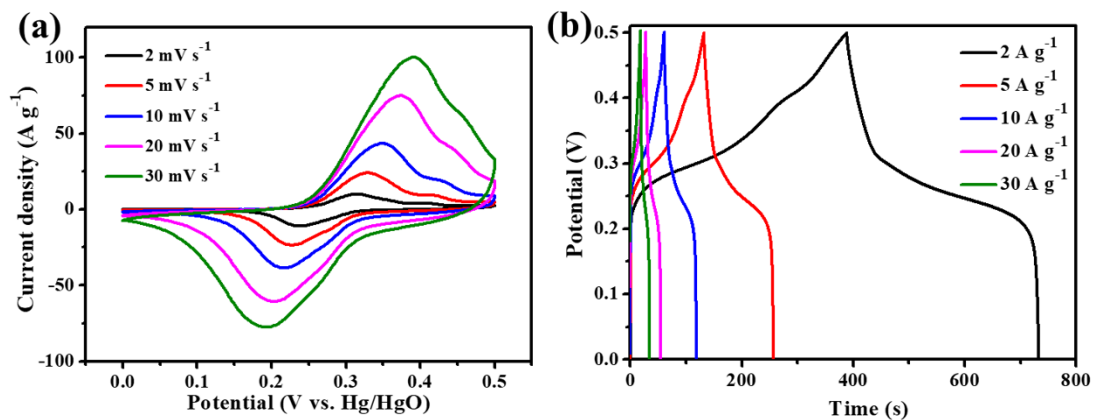

**Figure S4.** Electrochemical performances of S-(Ni<sub>0.85</sub>Se)<sub>3</sub>(Co<sub>0.85</sub>Se)/rGO electrode: (a) CV curves; (b) GCD curves.

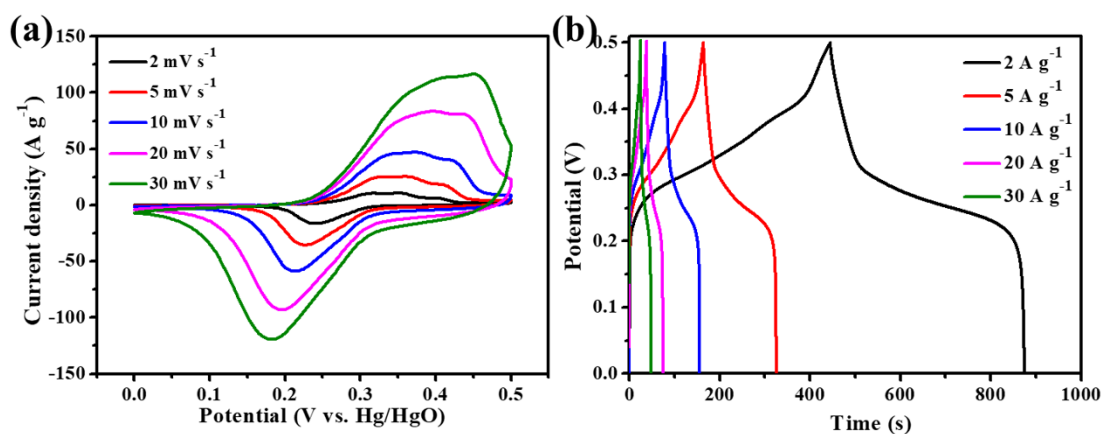

**Figure S5.** Electrochemical performances of (Ni<sub>0.85</sub>Se)<sub>3</sub>(Co<sub>0.85</sub>Se) electrode: (a) CV curves; (b) GCD curves.

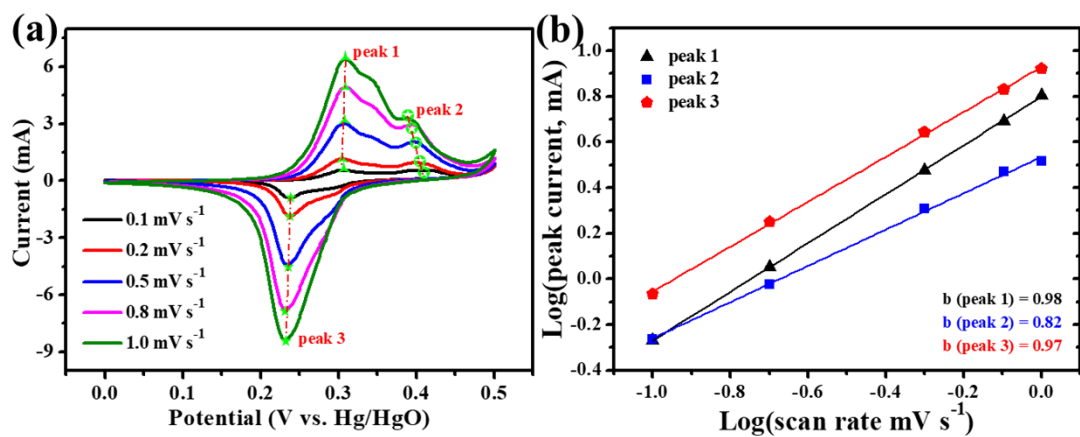

**Figure S6.** (a) CV curves of MS-(Ni<sub>0.85</sub>Se)<sub>3</sub>(Co<sub>0.85</sub>Se)/rGO at scan rates of 0.1~1.0 mV s<sup>-1</sup>; (b) the linear fitting plot of b value of different peaks.

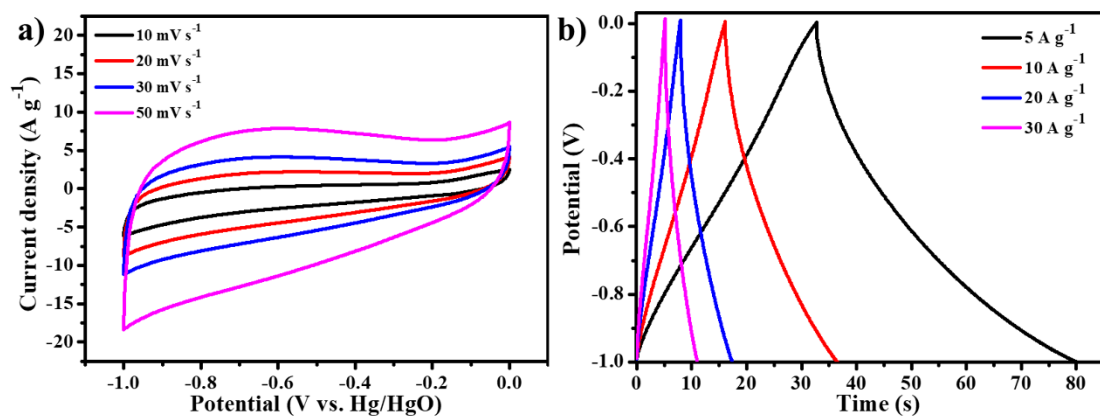

**Figure S7** Electrochemical performances of AC electrode: (a) CV curves; (b) GCD curves.
